# Supplementary material for: Fe-mediated synthesis of N-aryl amides from nitroarenes and acyl chlorides
Source: Royal Society of Chemistry journal article supplement (doi:10.1039/d0ra10868e), 2021-01-01

## Supporting Information

### Fe-mediated synthesis of N-aryl amides from nitroarenes and acyl chloride

Yundong Wu<sup>a</sup>, Lei Guo<sup>\*a</sup>, Yuxuan Liu<sup>b</sup>, Jiannan Xiang<sup>b</sup> and Jun Jiang<sup>\*c</sup>

<sup>a</sup> *School of Material and Chemical Engineering, Tongren University, Tongren 554300, China*

<sup>b</sup> *College of Chemistry and Chemical Engineering, Hunan University, Changsha 410082, China*

<sup>c</sup> *School of Chemistry and Chemical Engineering, Hunan University of Science and Technology, Xiangtan 411201, China*

\*Corresponding authors: [cqglei@163.com](mailto:cqglei@163.com) (L. Guo); [jiangjunhust@163.com](mailto:jiangjunhust@163.com) (J. Jiang)

# NMR Spectra

## *N*-phenylbenzamide (3aa)

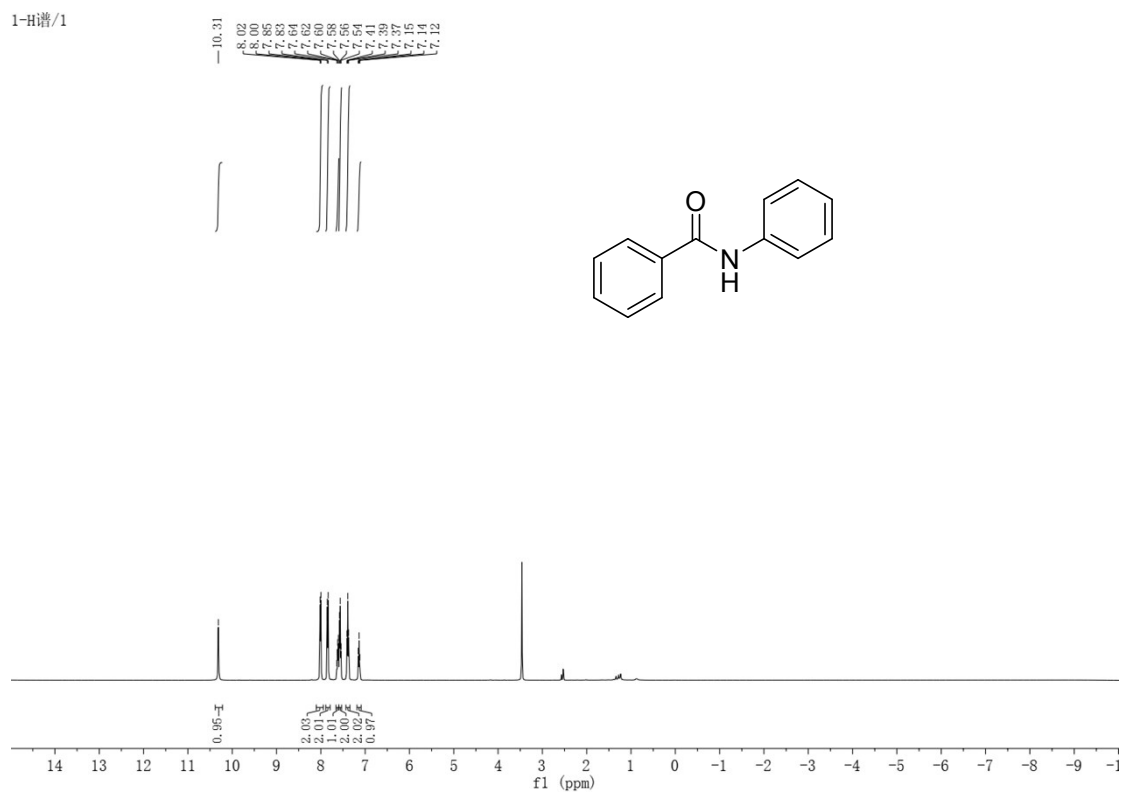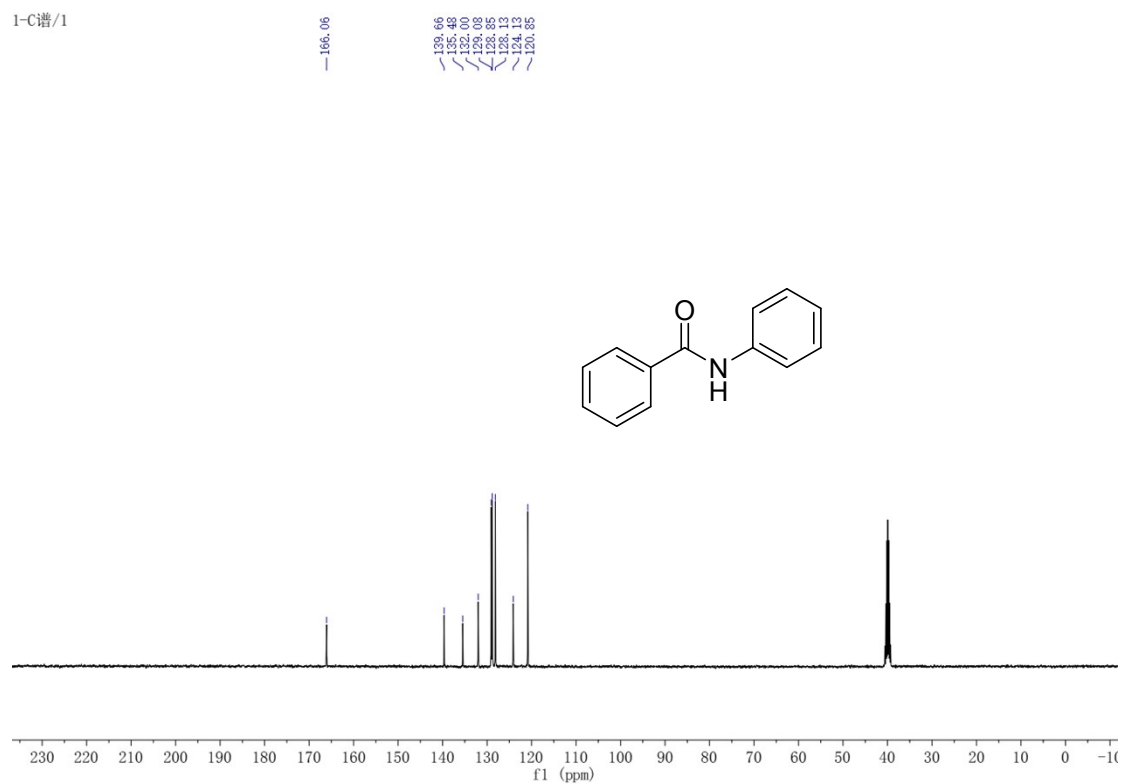

4-methyl-N-phenylbenzamide (3ab)

lyx-x3-1/2

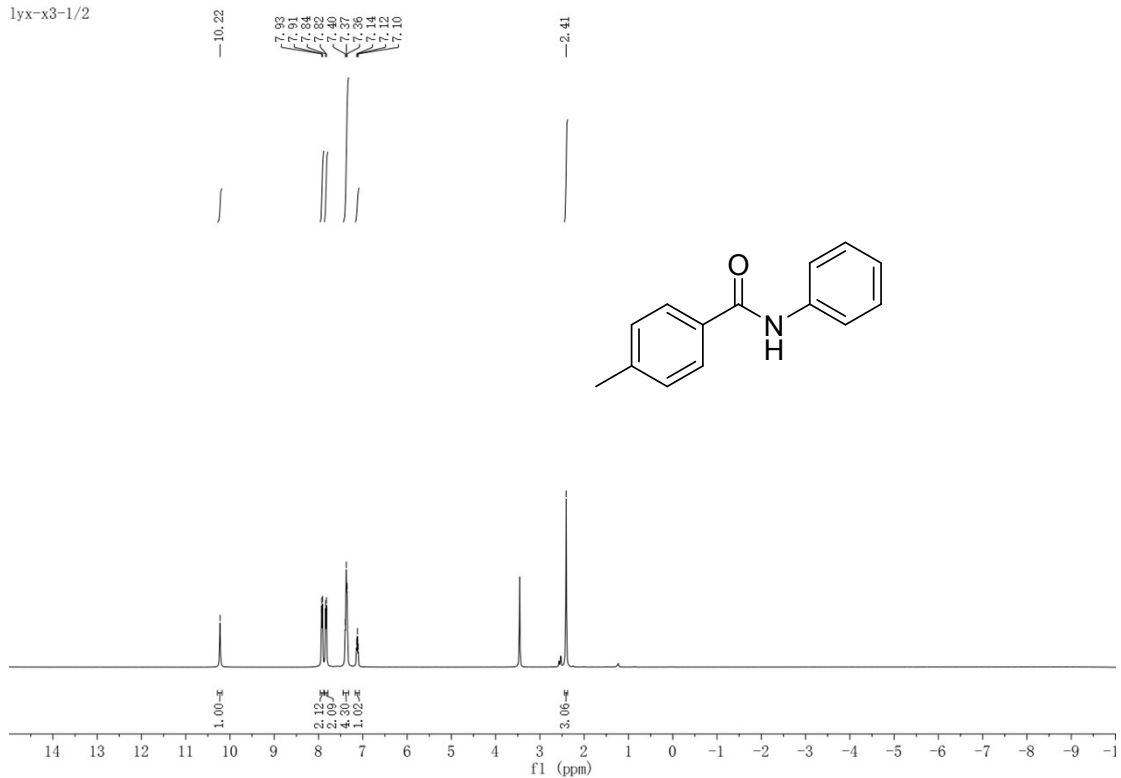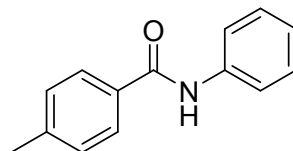

lyx-x3-c-3/1

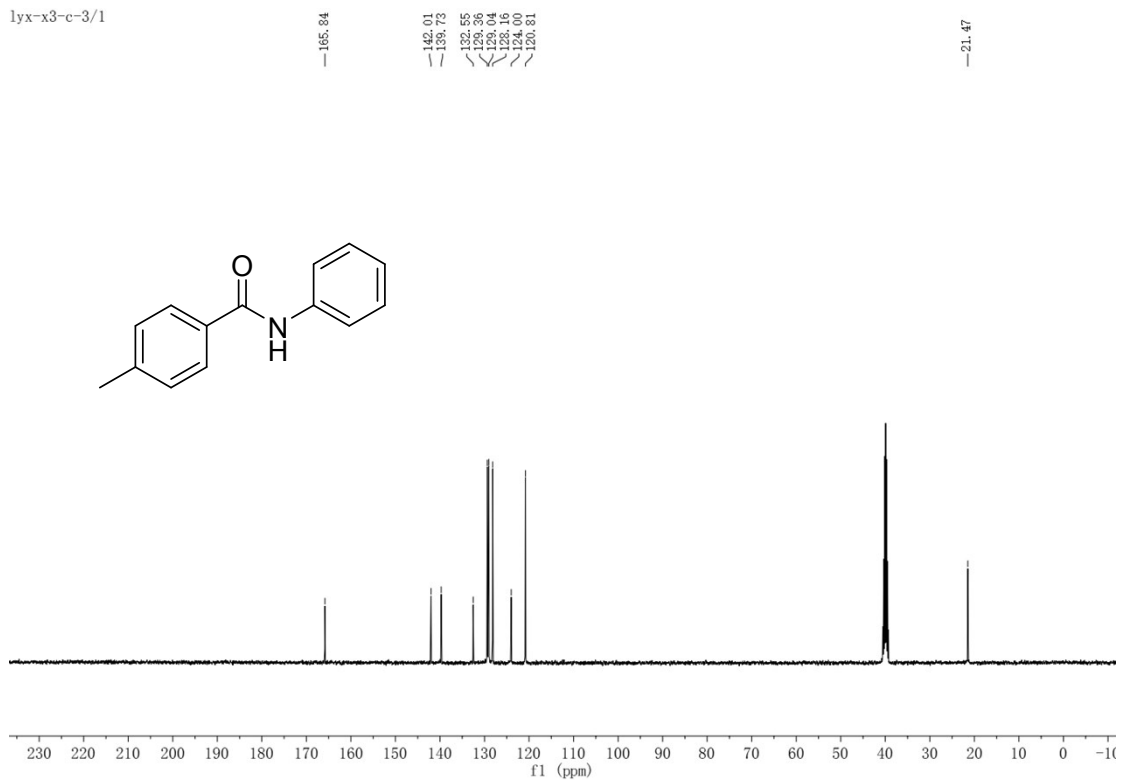

2-methyl-N-phenylbenzamide (3ac)

lyx-x6-6/2

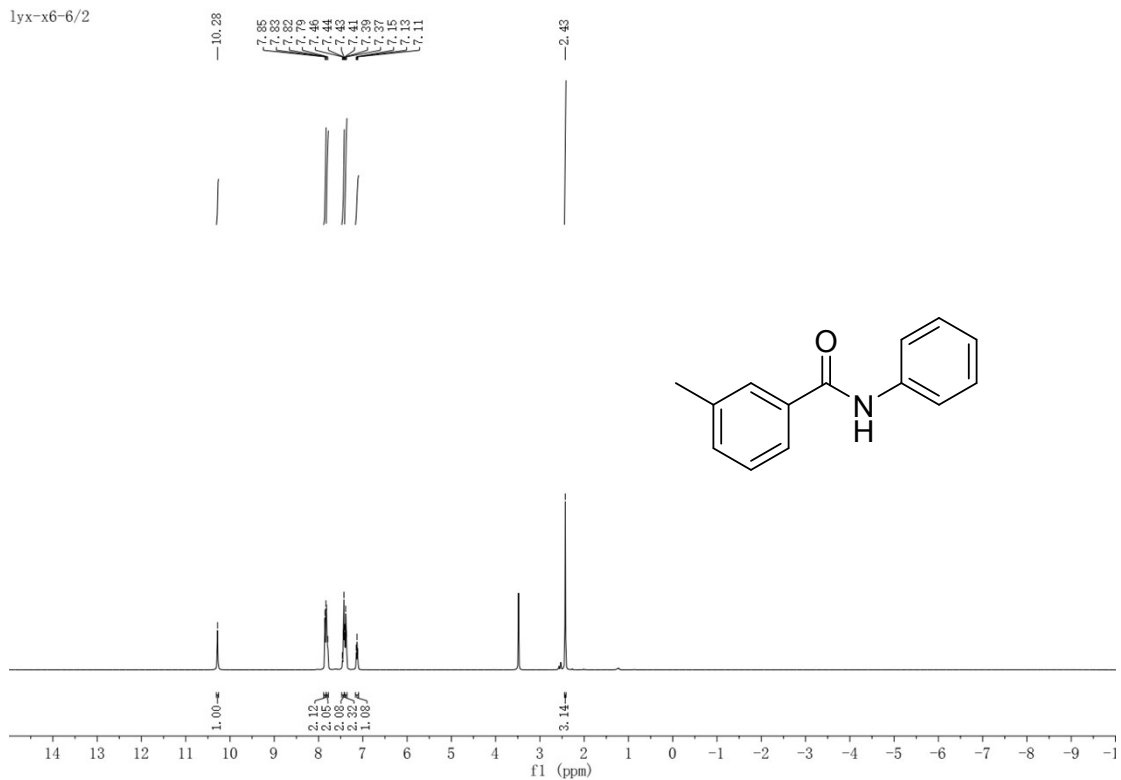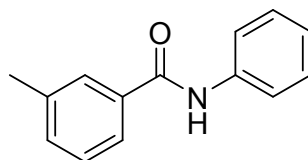

lyx-x6-6/1

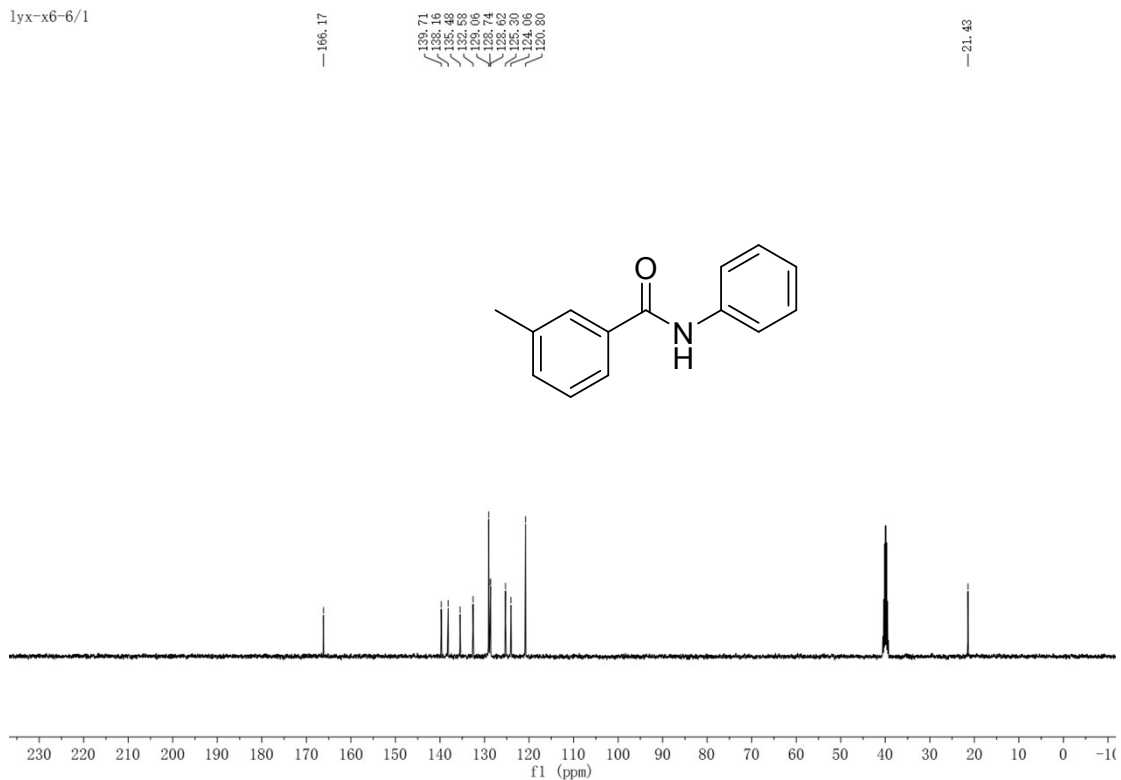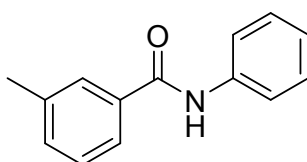

2-methyl-N-phenylbenzamide (3ad)

lyx-x5h-5/1

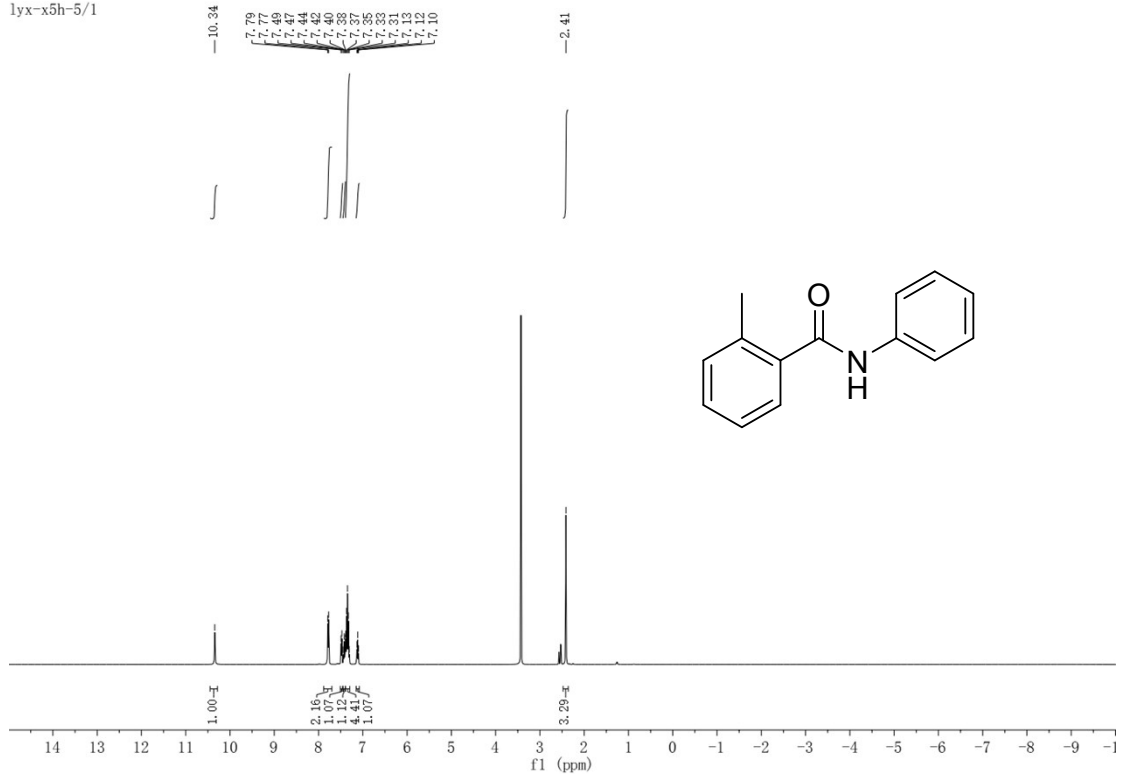

lyx-x5-5/2

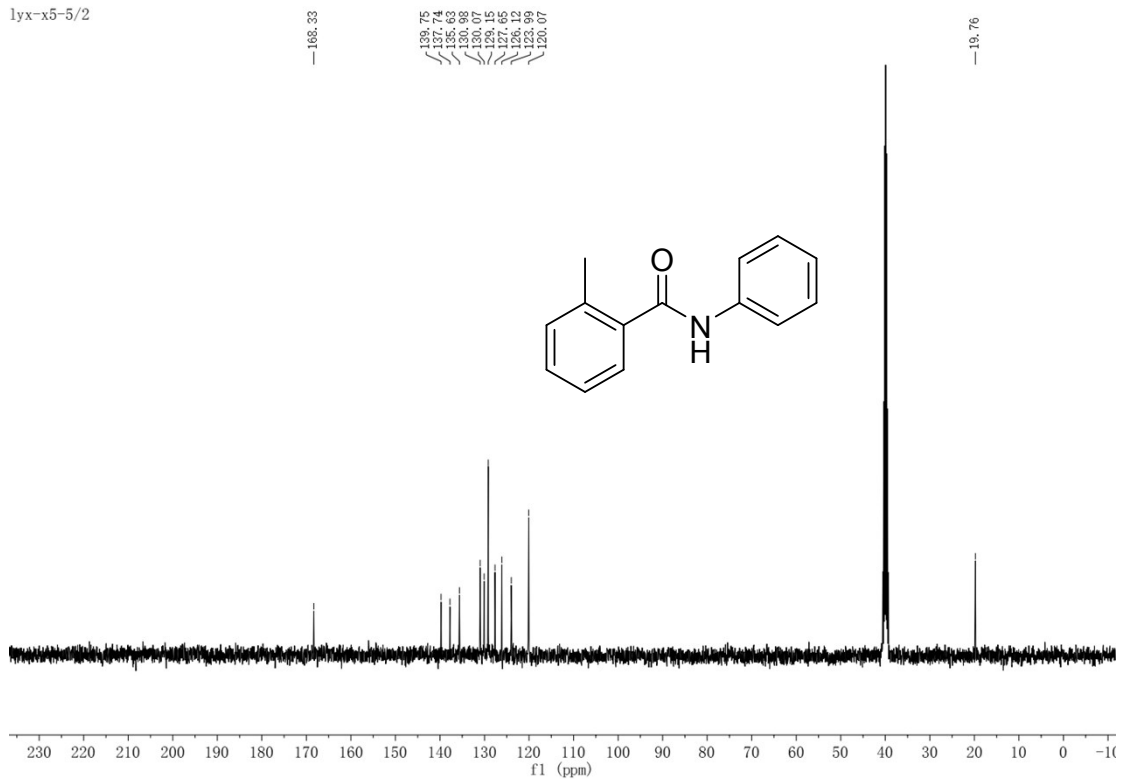

3,5-dichloro-N-phenylbenzamide (3ae)

lyx-x4-15/1

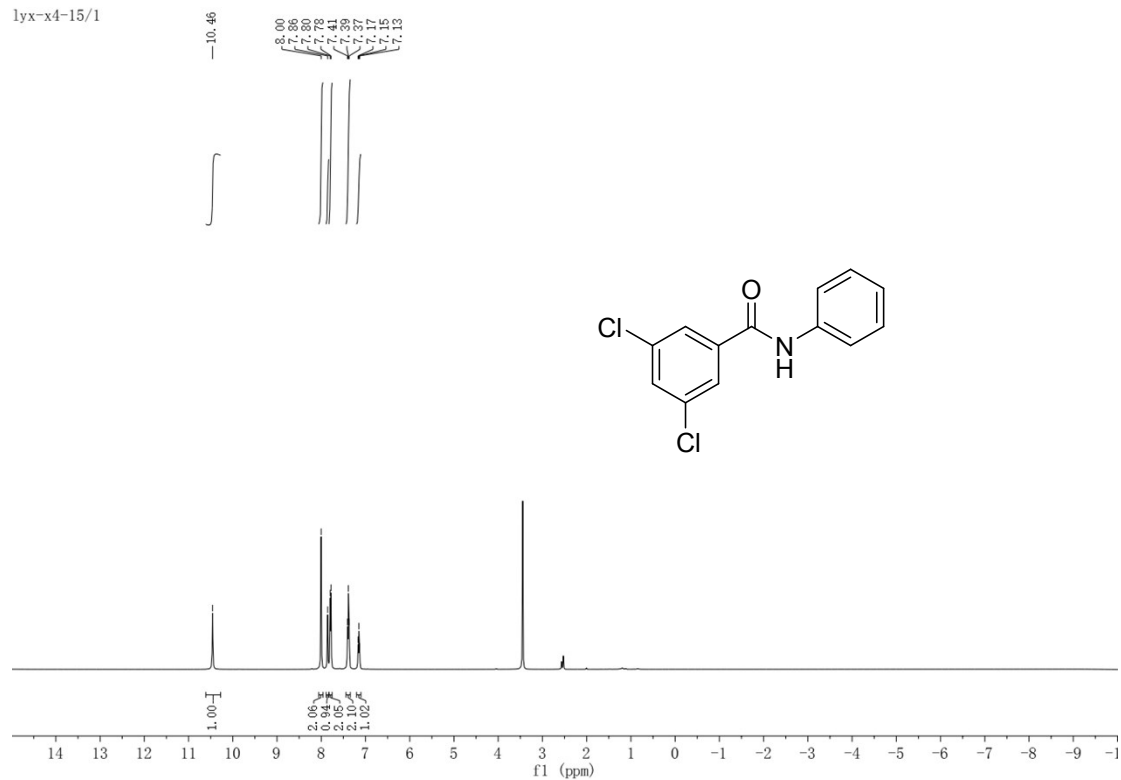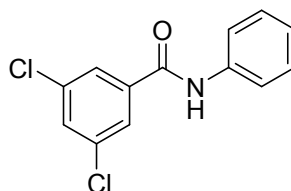

lyx-x4-c-20/1

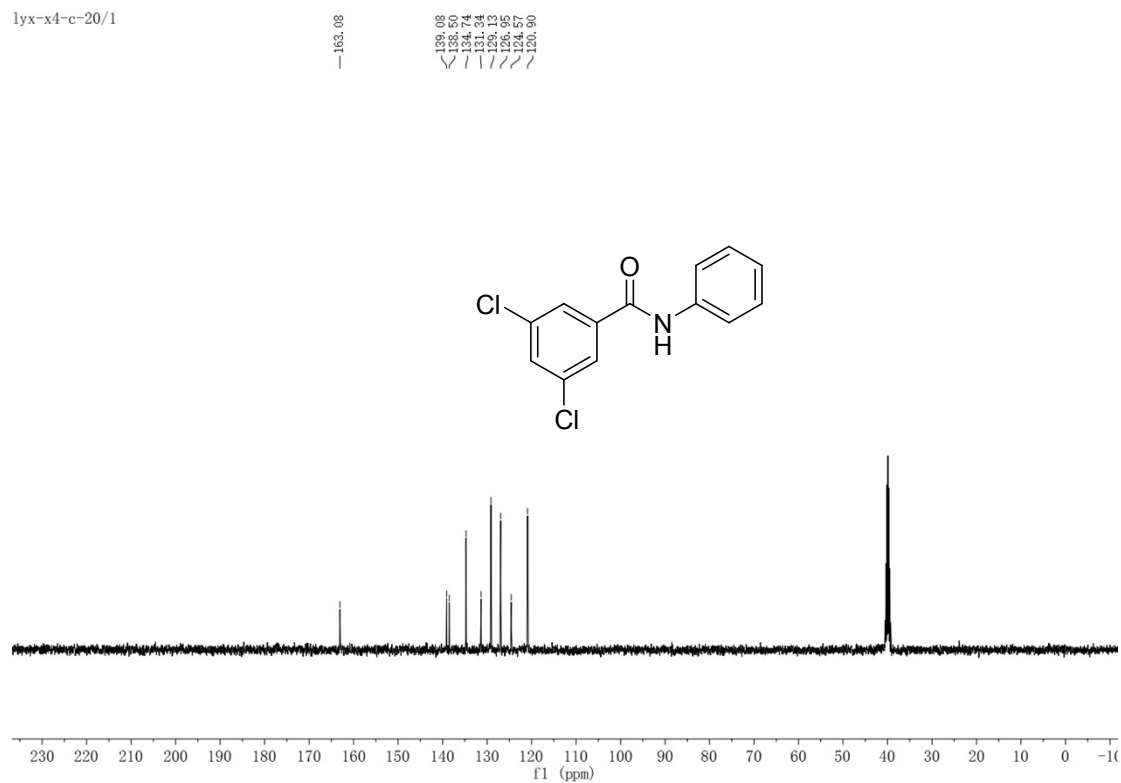

*N*-phenylisobutyramide (**3af**)

lyx-x2-22/2

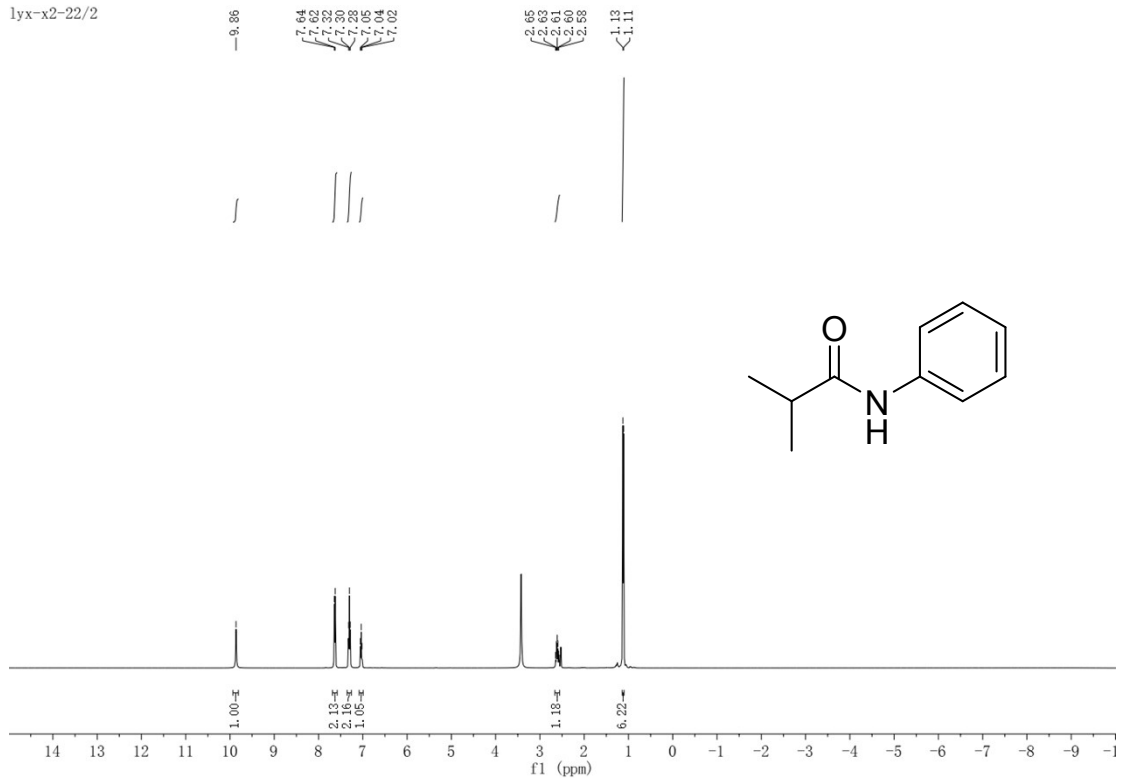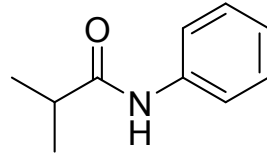

lyx-x2-20/1

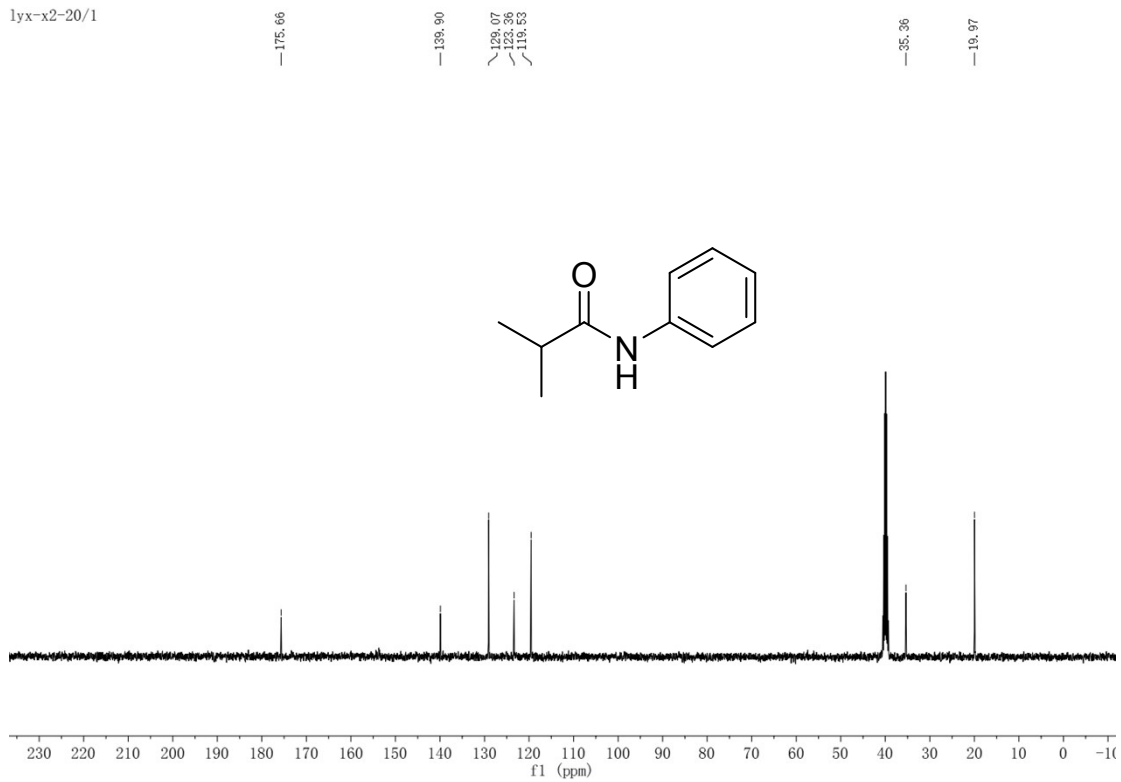

# 4-fluoro-N-phenylbenzamide (3ag)

lyx-x7-h-17/2

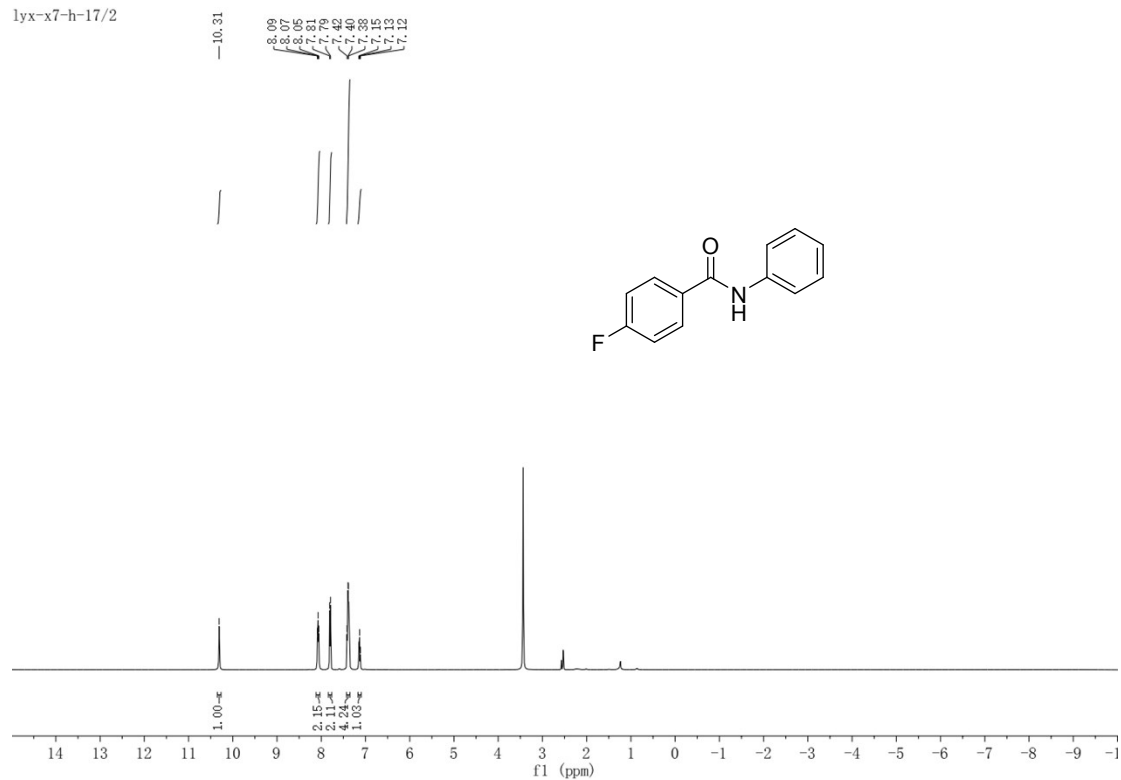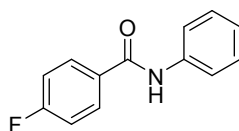

lyx-x7-c-1/1

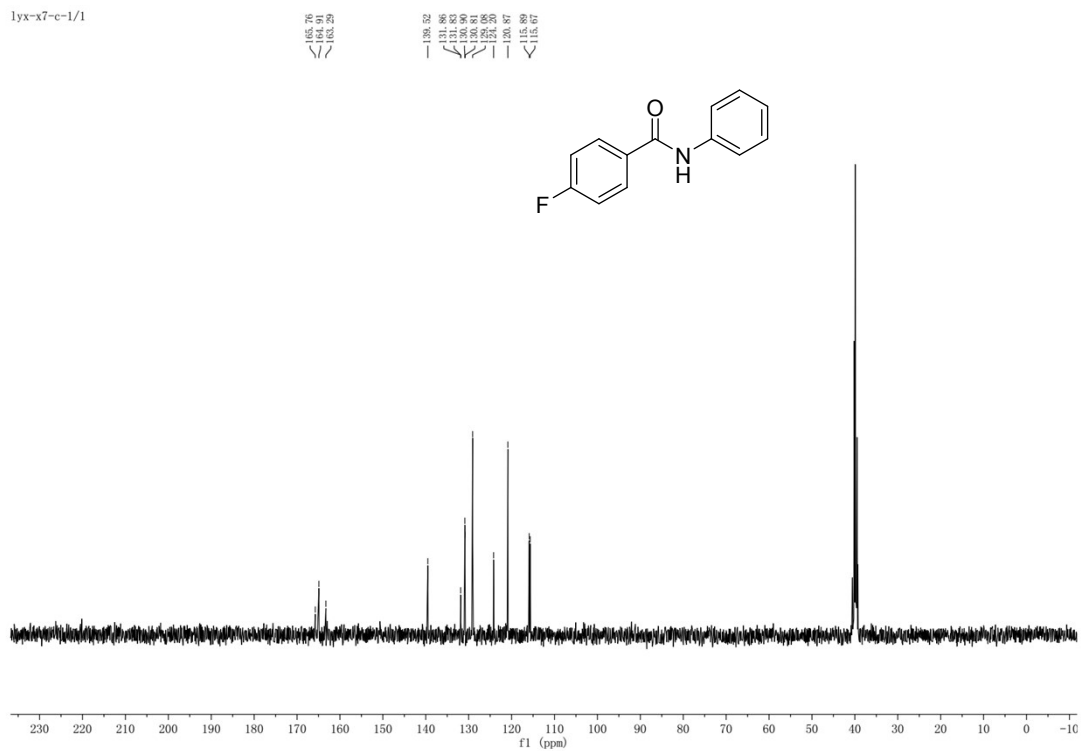



### 3-bromo-N-phenylbenzamide (3ah)

lyx-x10-h-19/1

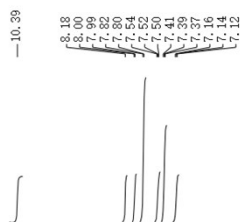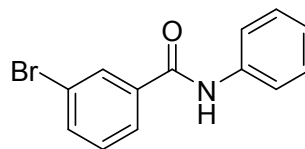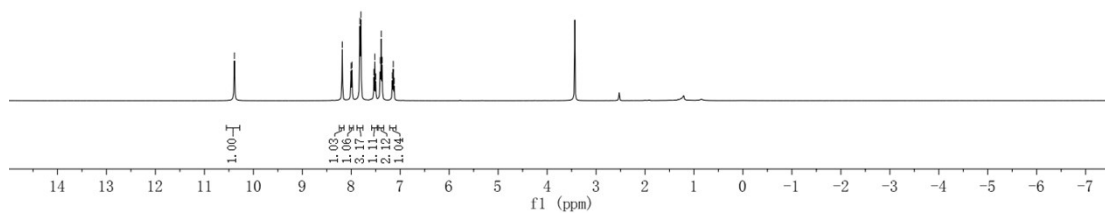

lyx-x10-c/10

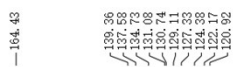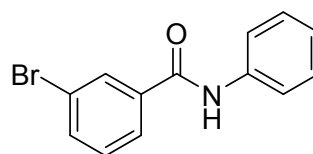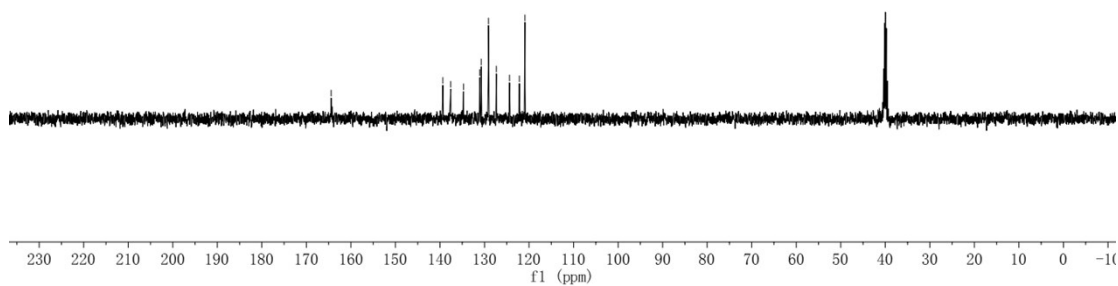

4-chloro-N-phenylbenzamide (3ai)

lyx-x9-h-15/1

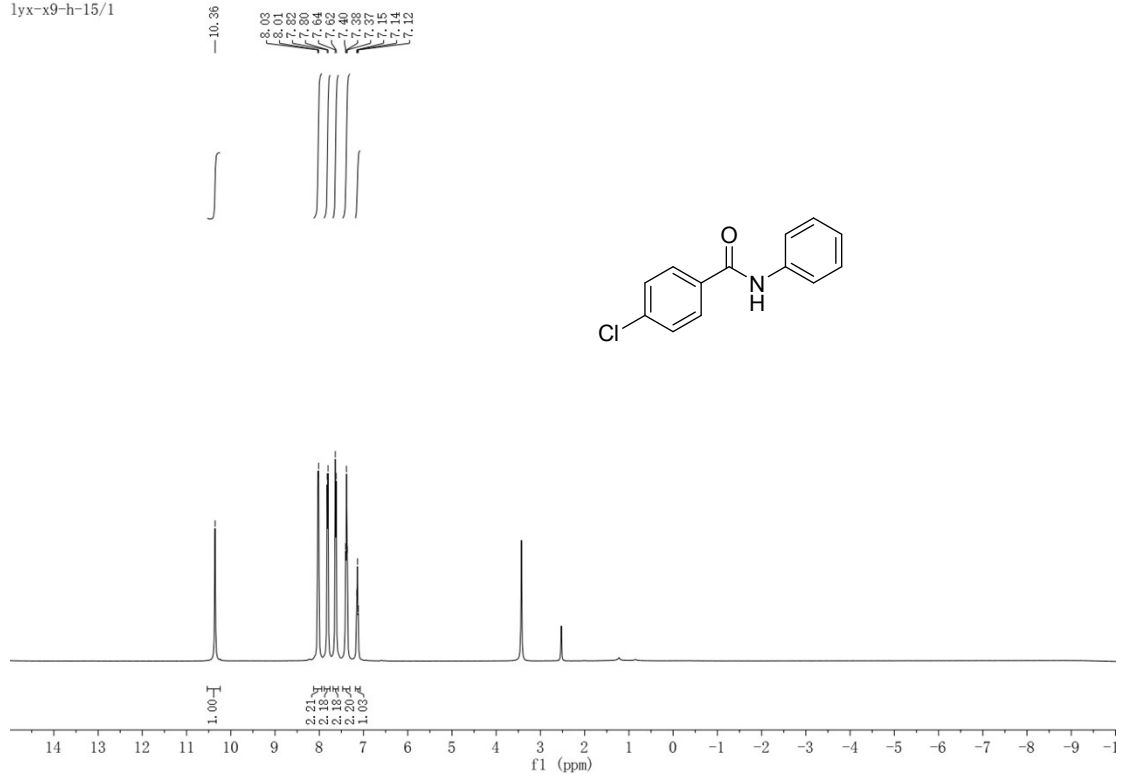

2019-03-06/9

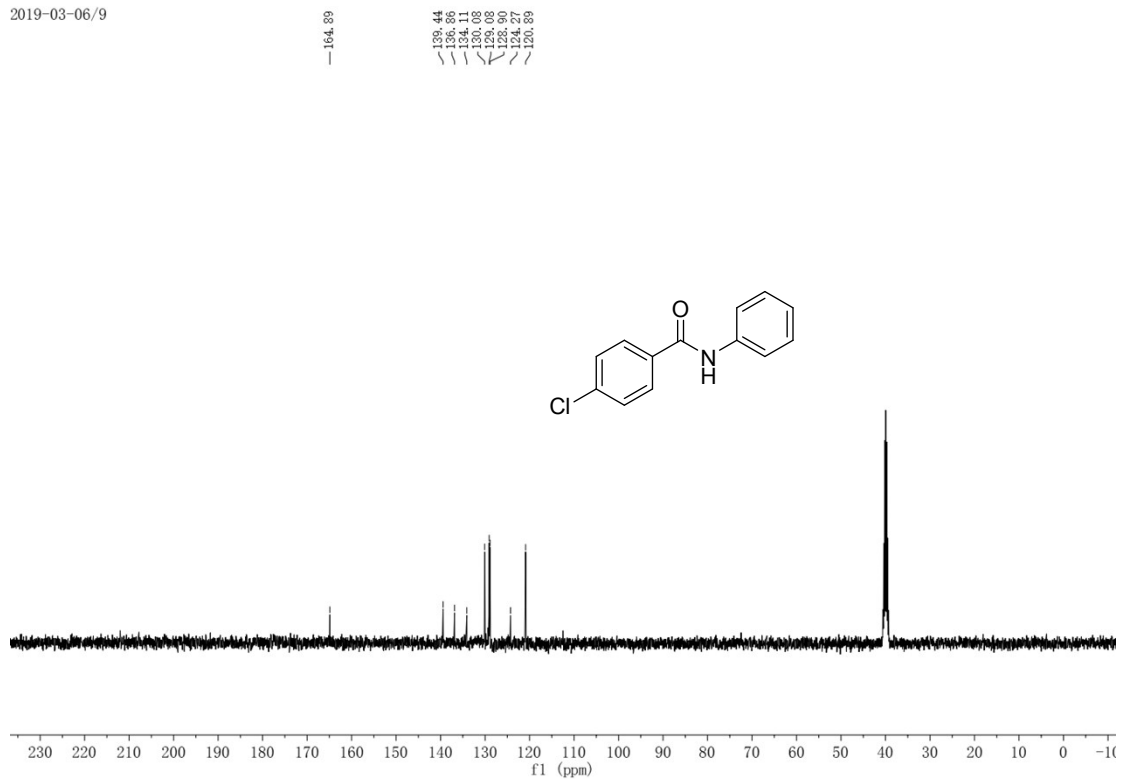

*N*-phenyl-4-(trifluoromethyl)benzamide (**3aj**)

nmr/2  
lyx-x11-h

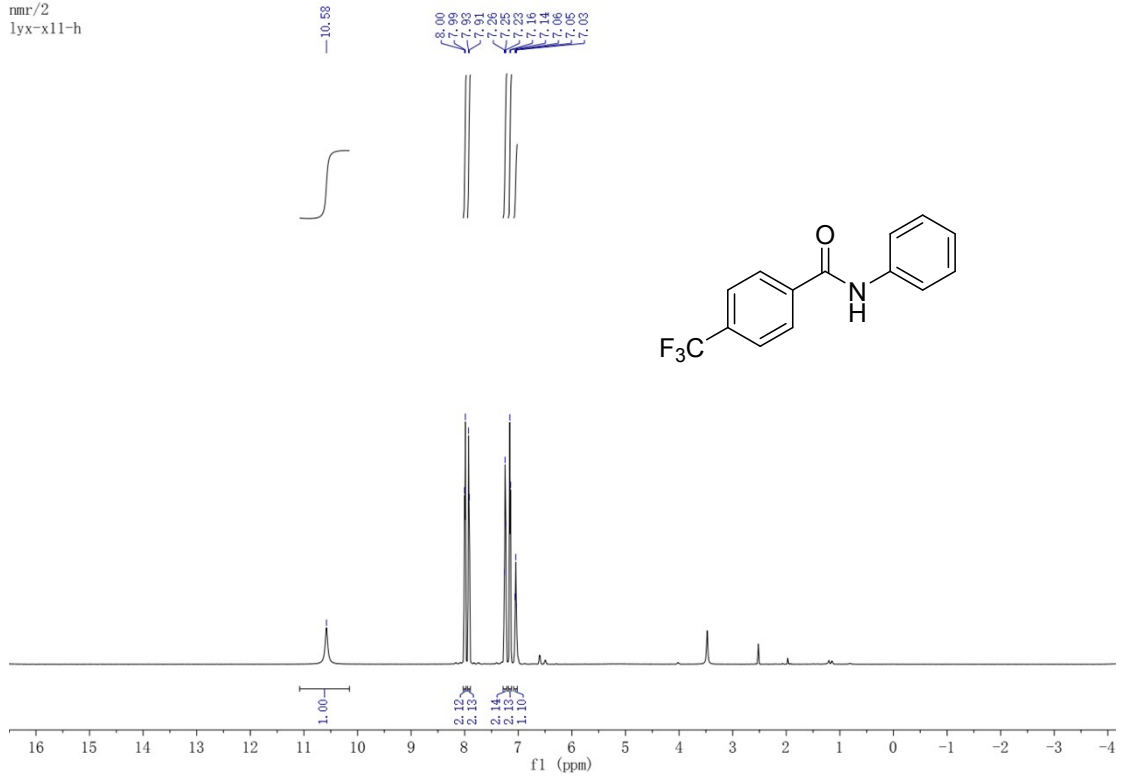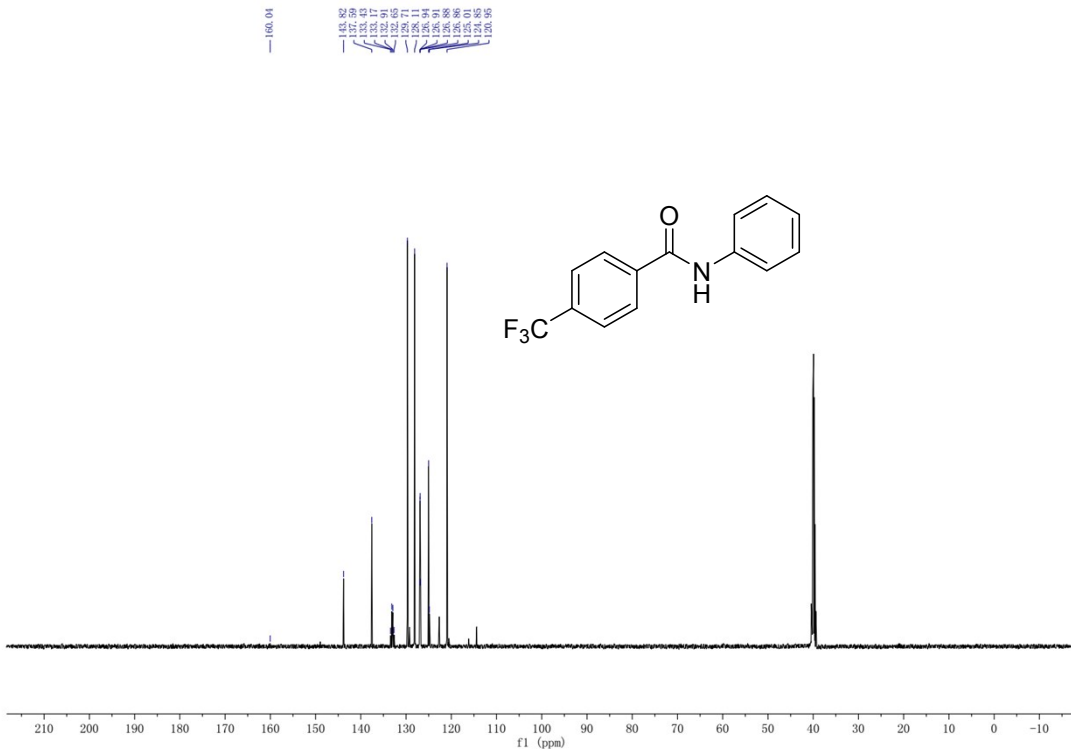

*N*-phenylfuran-2-carboxamide (3ak)

20200613-NO.1-3/1

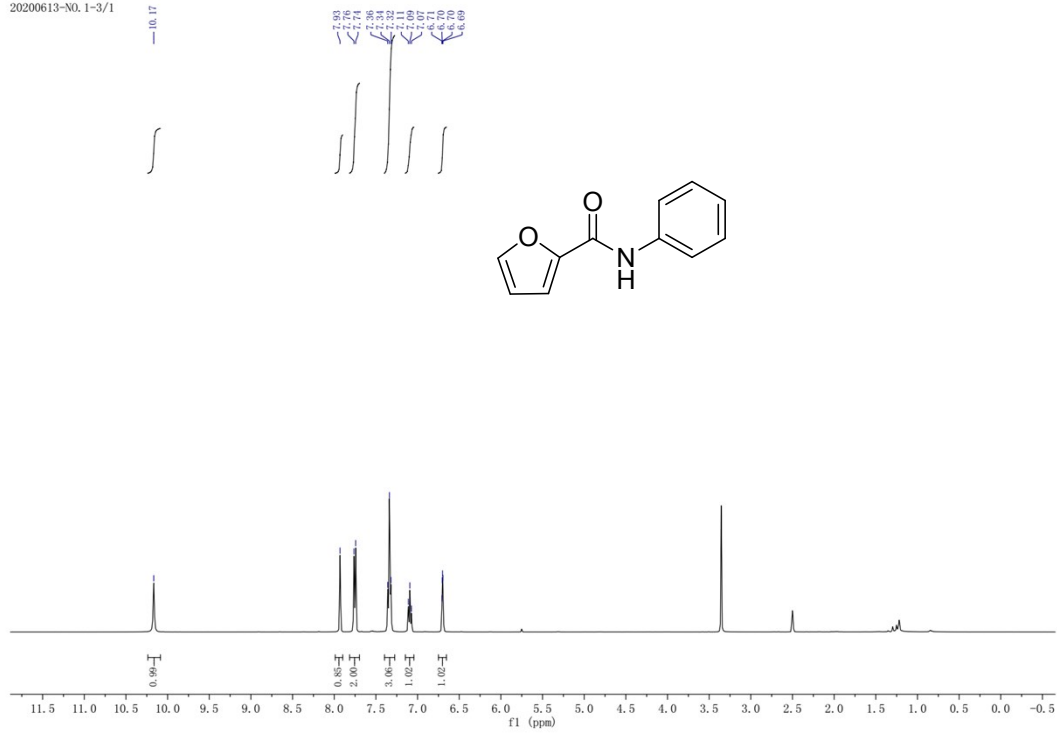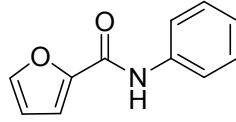

20200613-NO.1-3/2

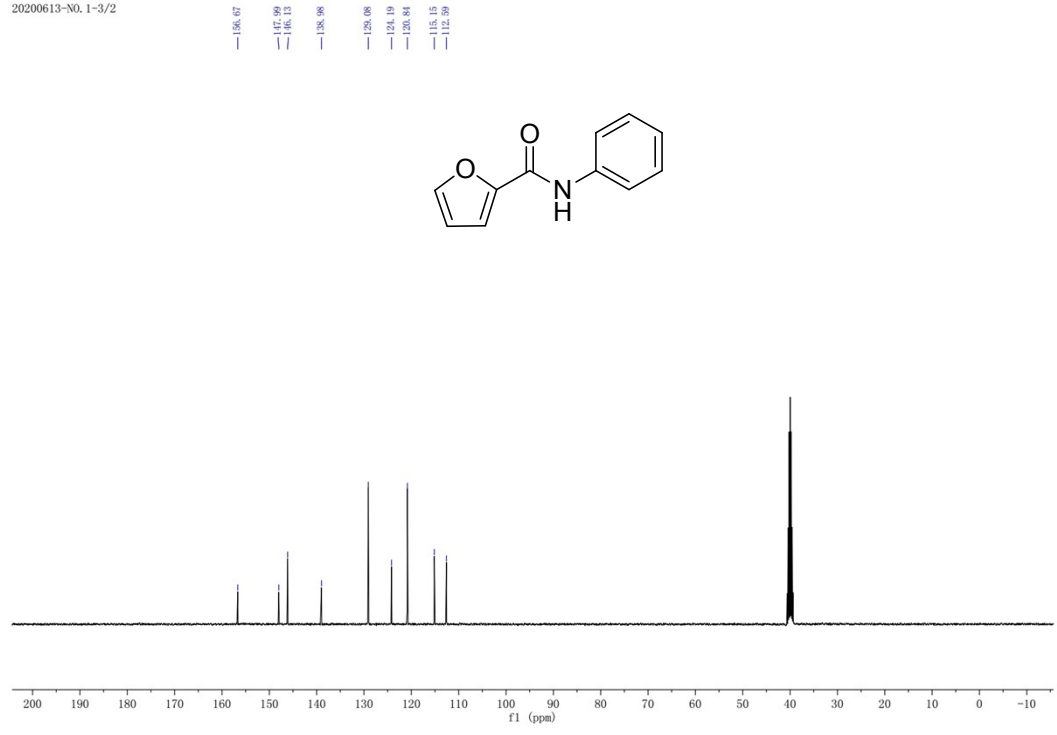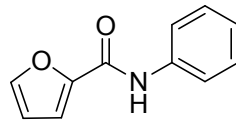

*N*-phenylcyclohexanecarboxamide (3a)

20200613-N0. 1-4/1

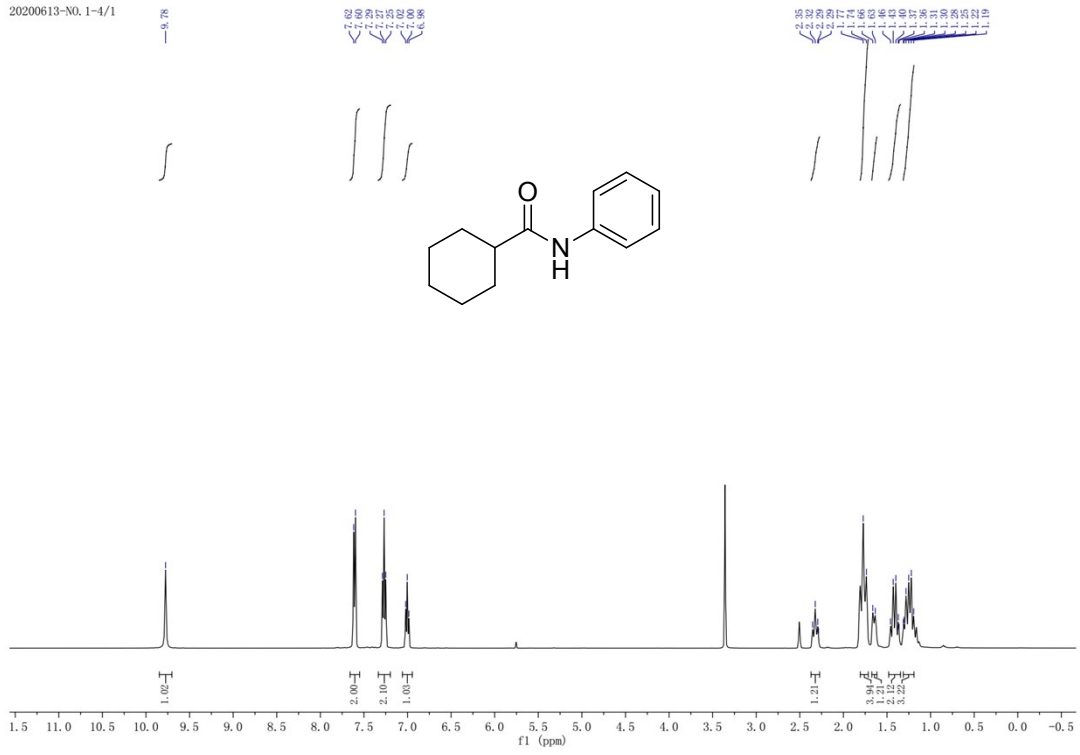

20200613-N0. 1-4/2

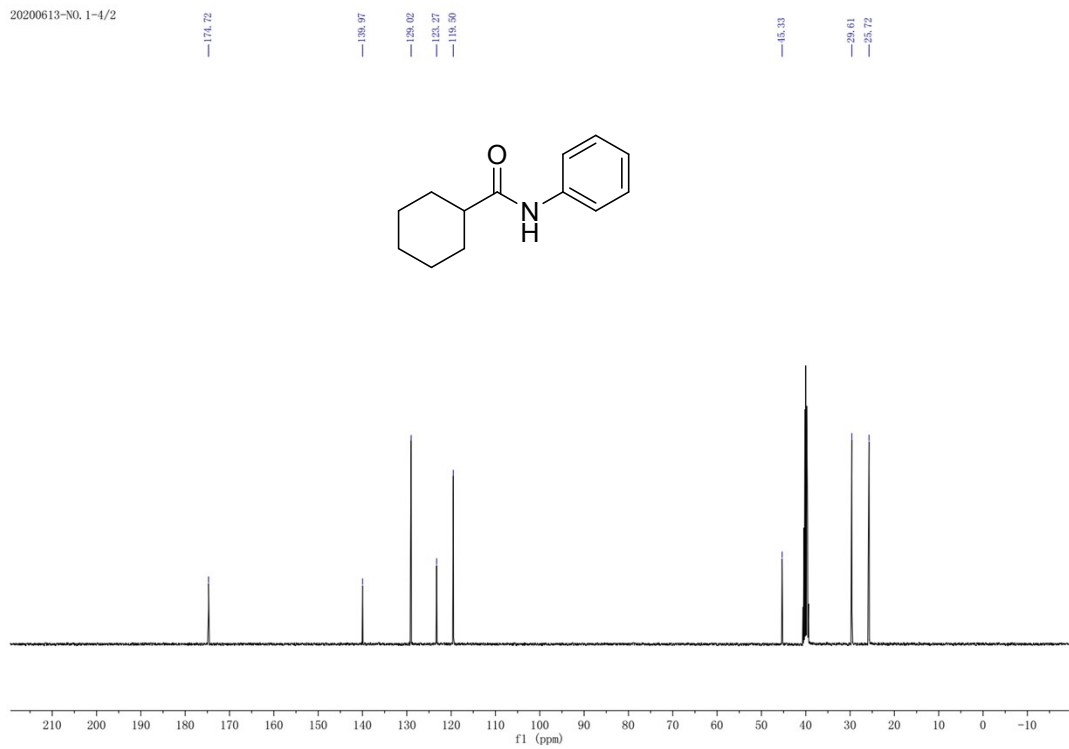

*N*-(*p*-tolyl)benzamide (**3ba**)

lyx-y9-h-9/2

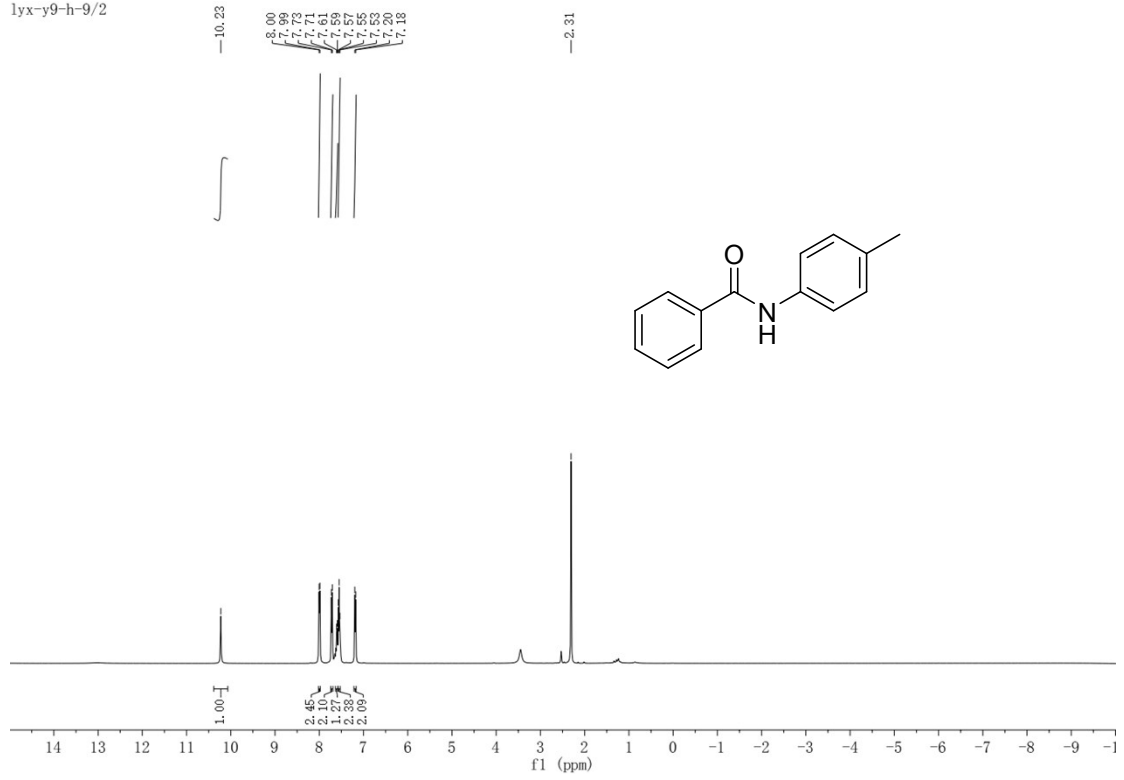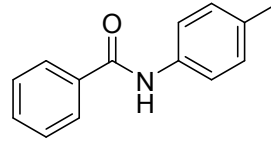

lyx-y9-c/9

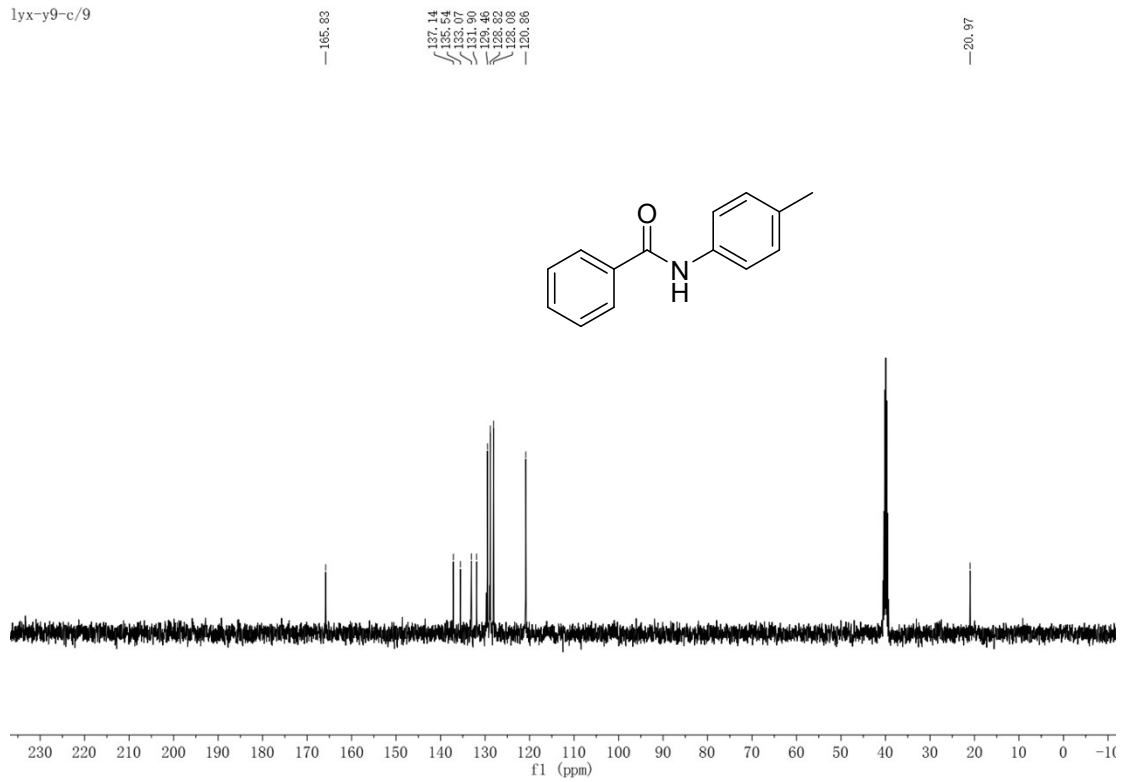

*N*-(*m*-tolyl)benzamide (**3ca**)

lyx-y10-h-10/1

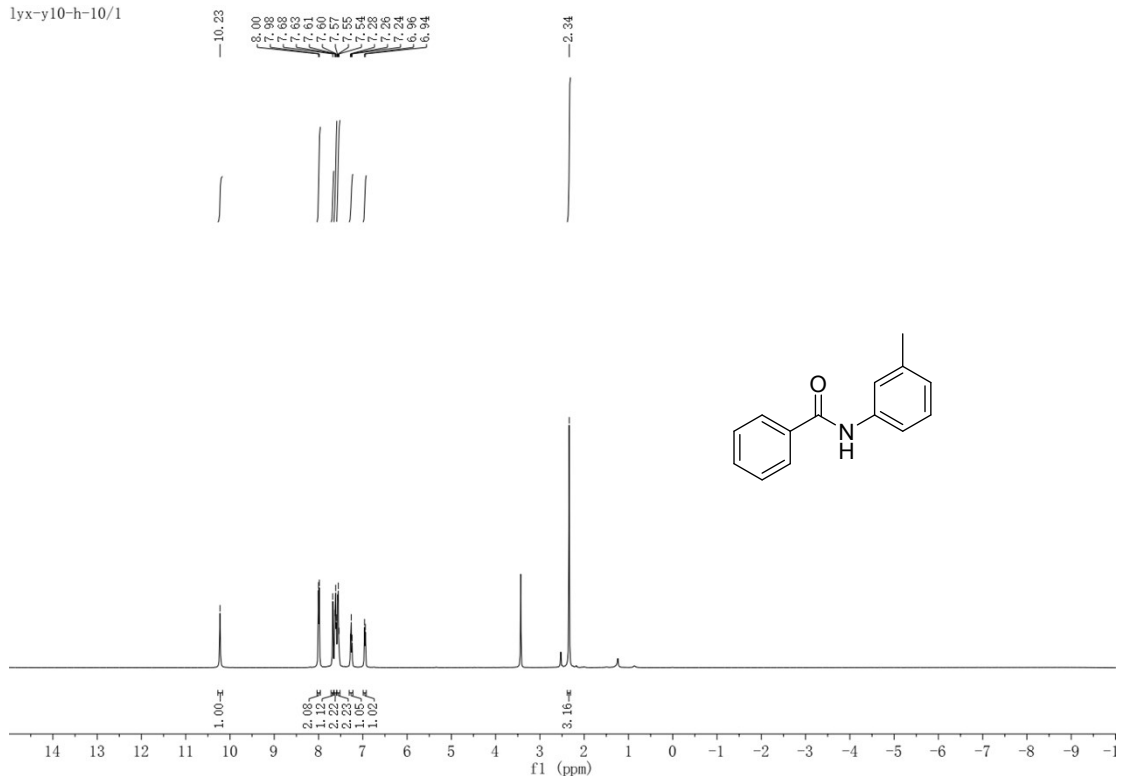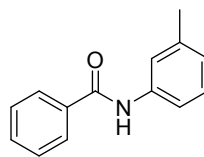

lyx-y10-c/10

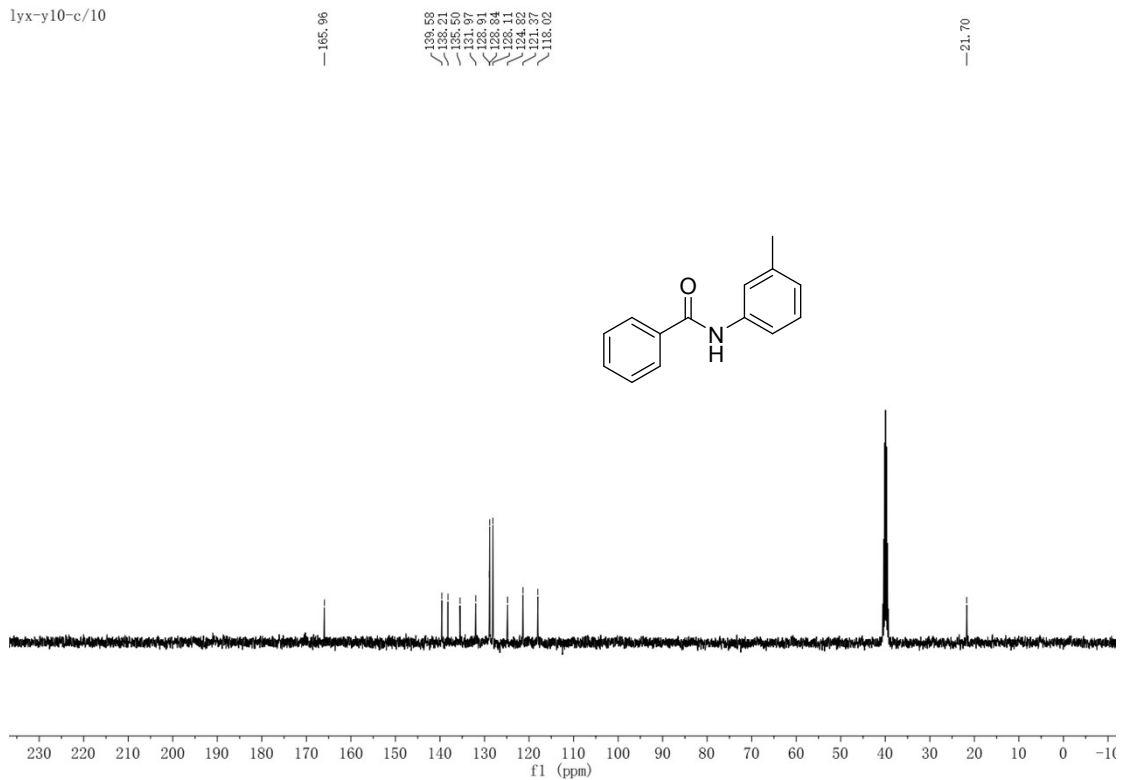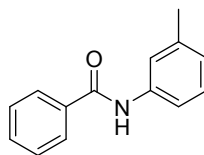

*N*-(*o*-tolyl)benzamide (3da)

lyx-y2-h-2/1

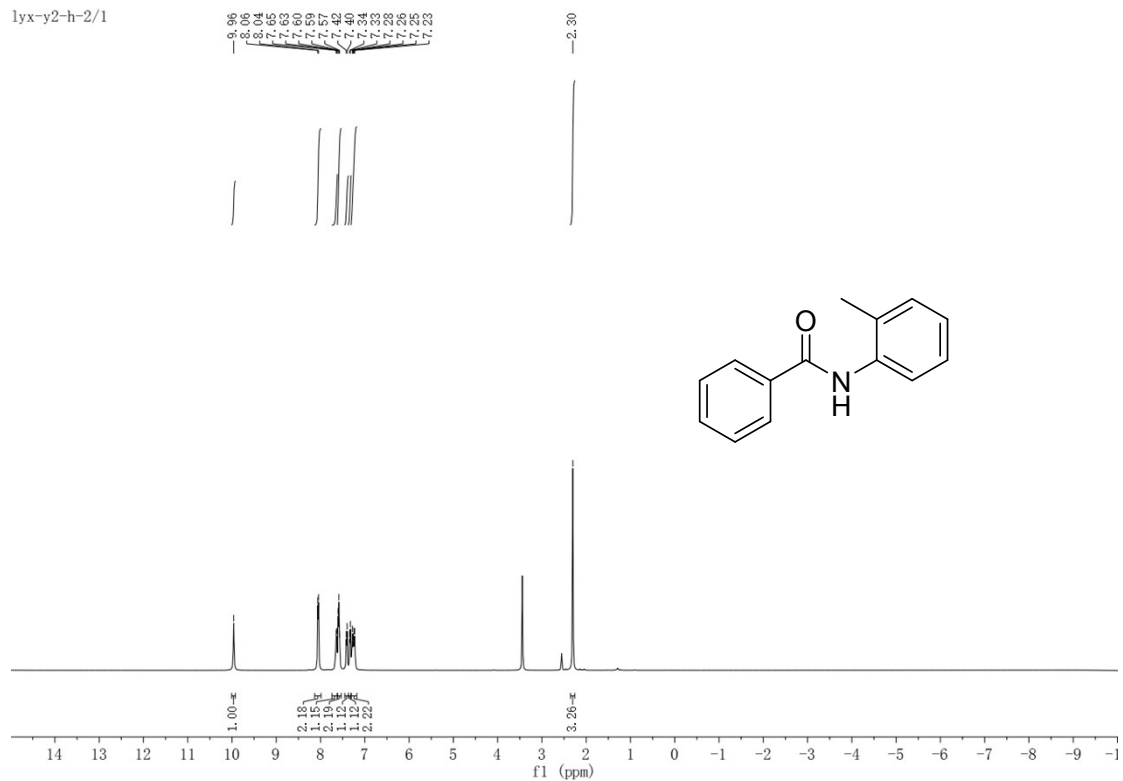

20181225-wbf-lyx-y2-c. 16. fid  
hnu

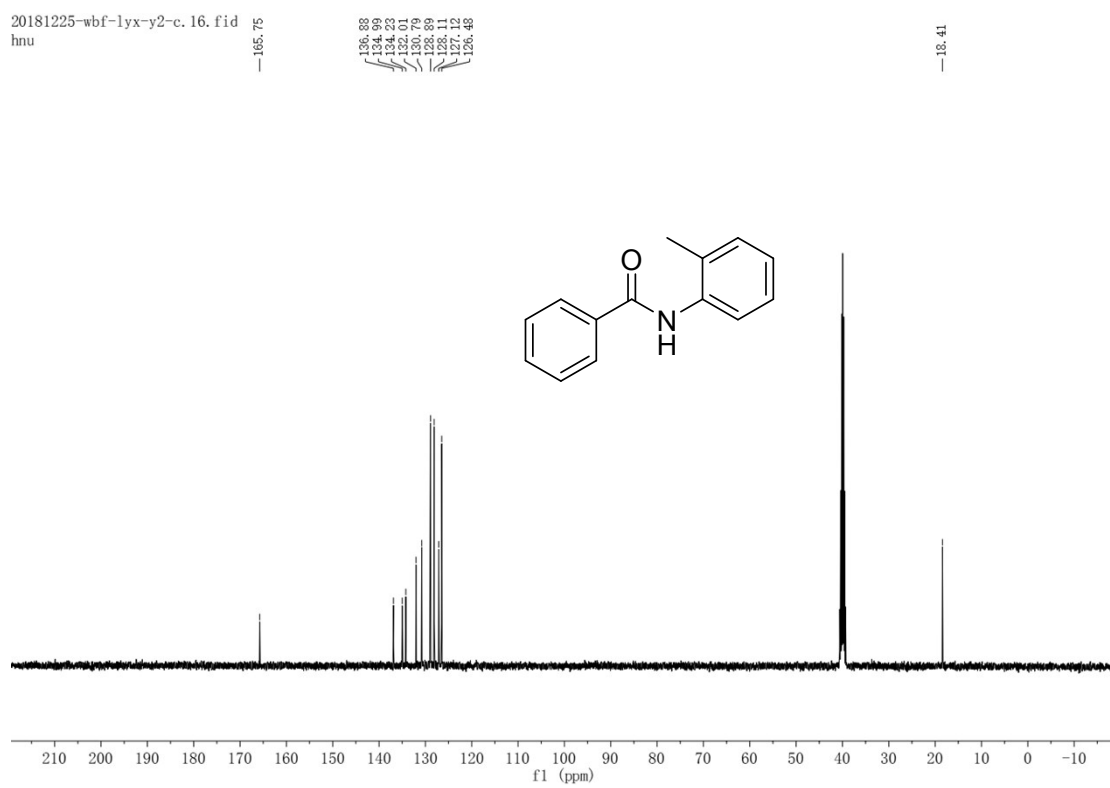



*N*-(4-chlorophenyl)benzamide (**3ea**)

lyx-y3-h-3/2

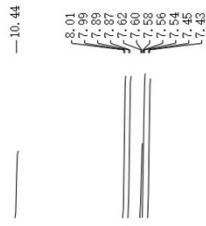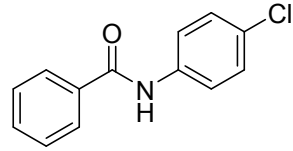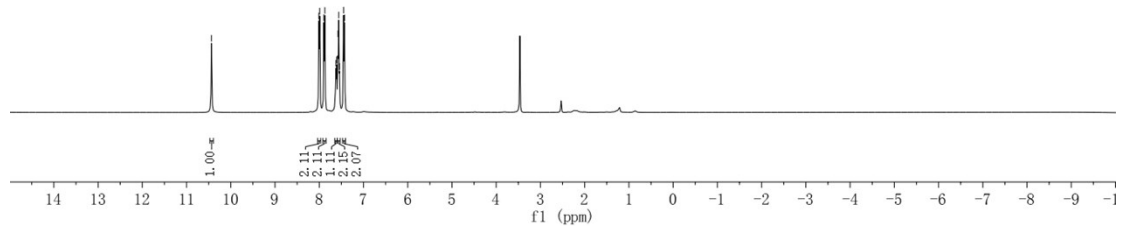

lyx-y3-c/3

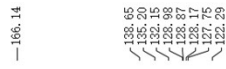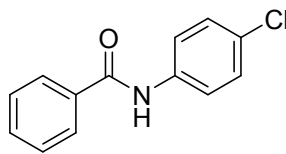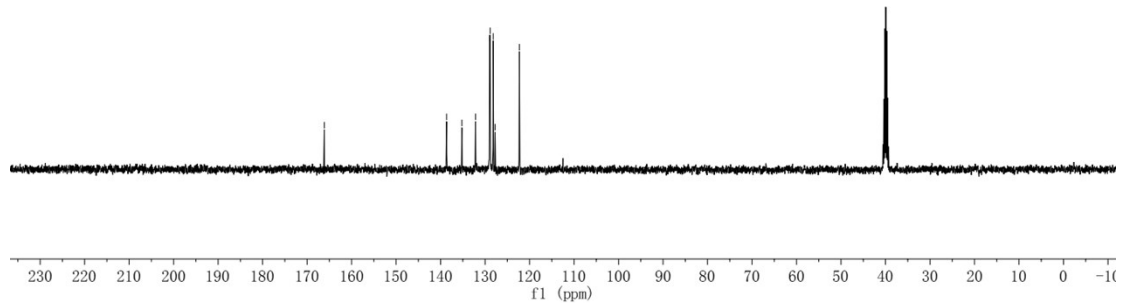

*N*-(4-bromophenyl)benzamide (**3fa**)

y4-4/1

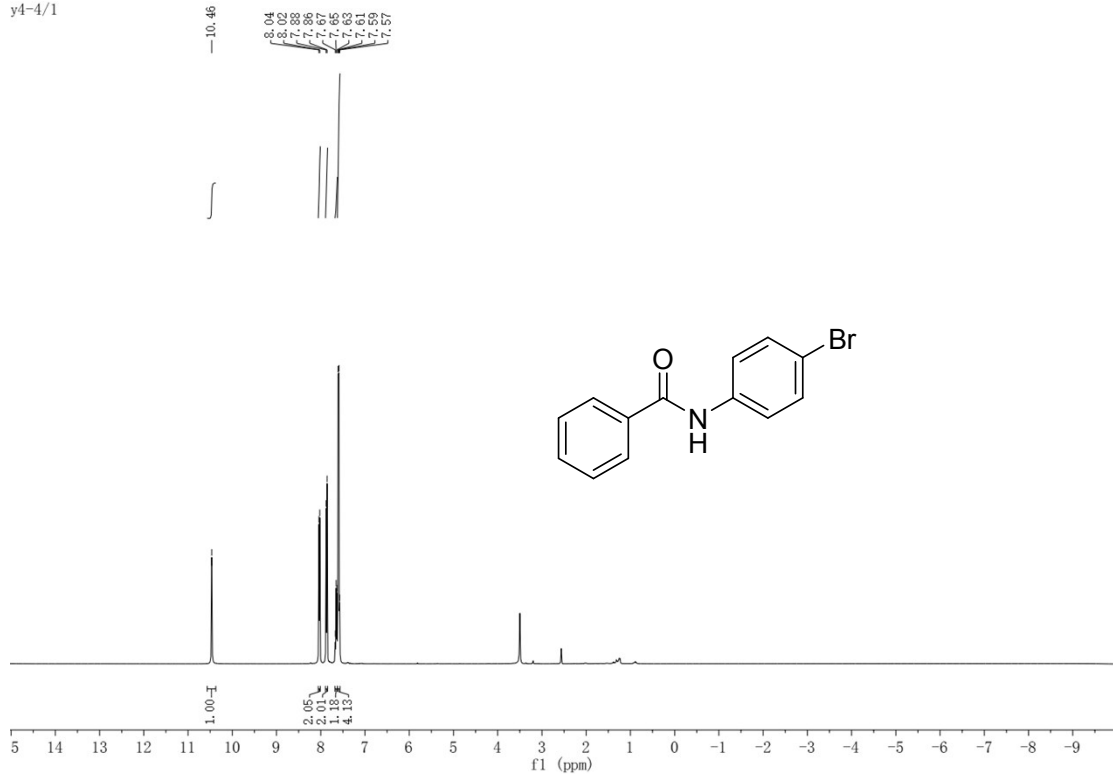

2019-01-14/4

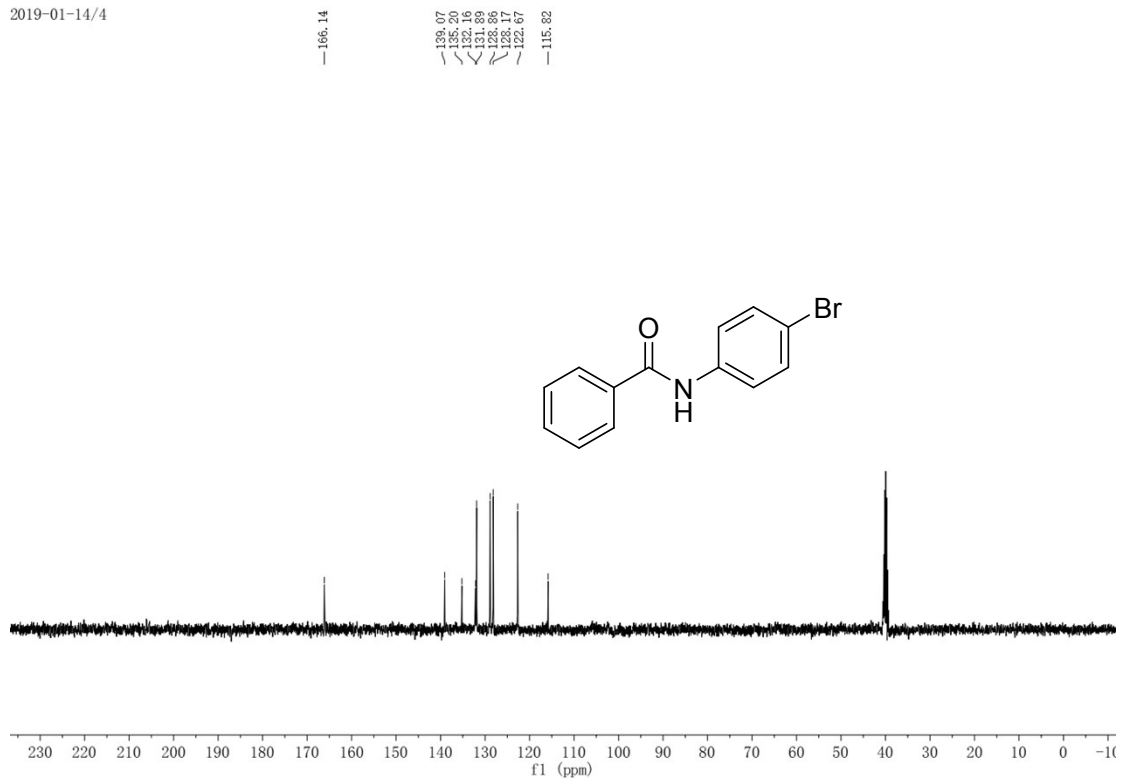

*N*-(2-chloro-5-methylphenyl)benzamide (**3ga**)

lyx-y6-h-4/1

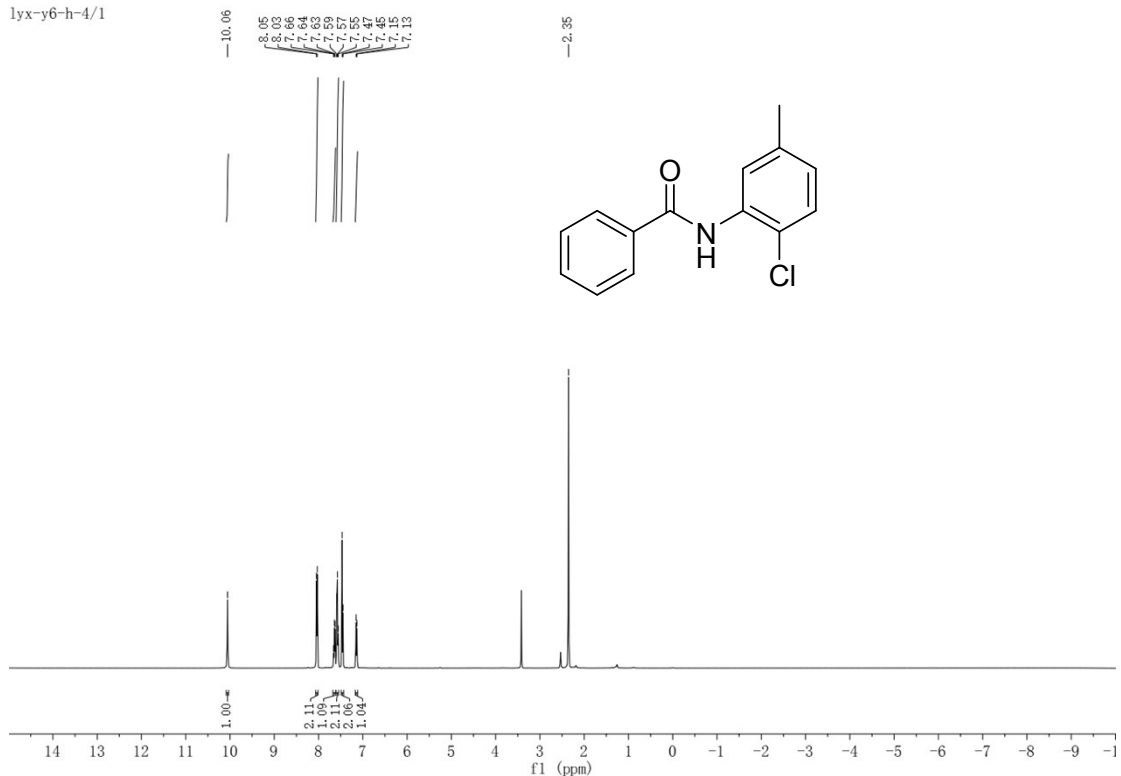

lyx-y6-c/6

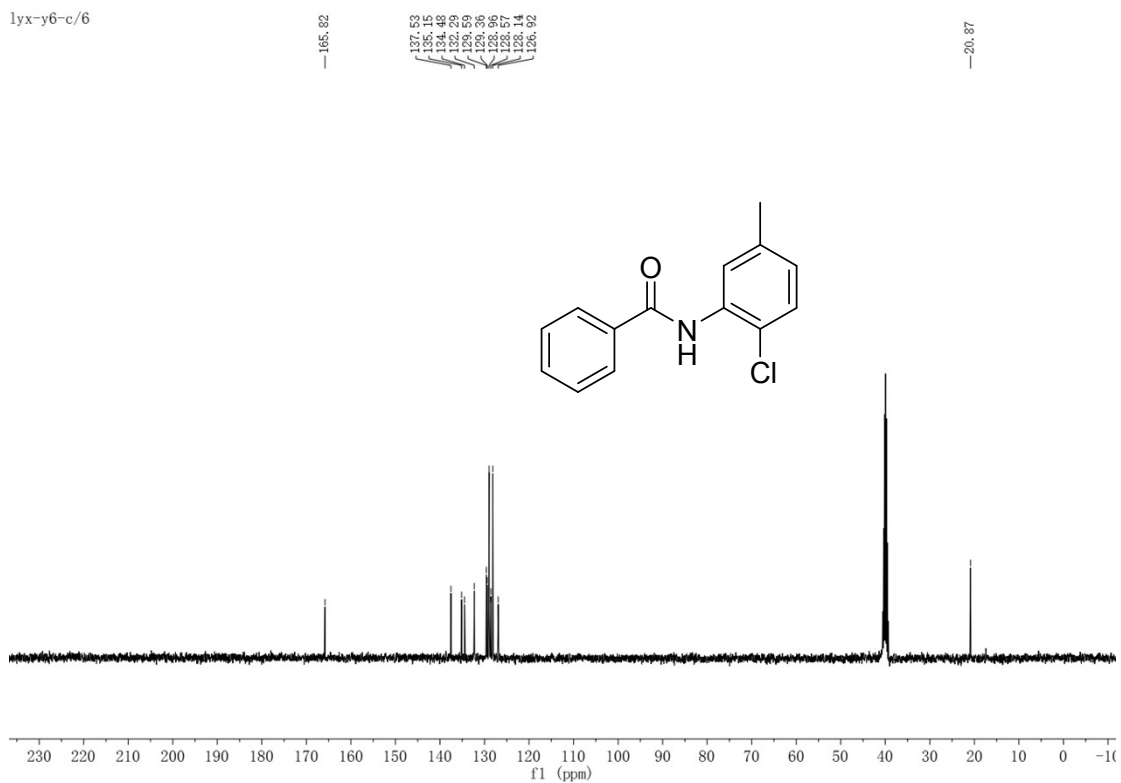

*N*-(2-chloro-5-methoxyphenyl)benzamide (**3ha**)

lyx-y7-h-17/2

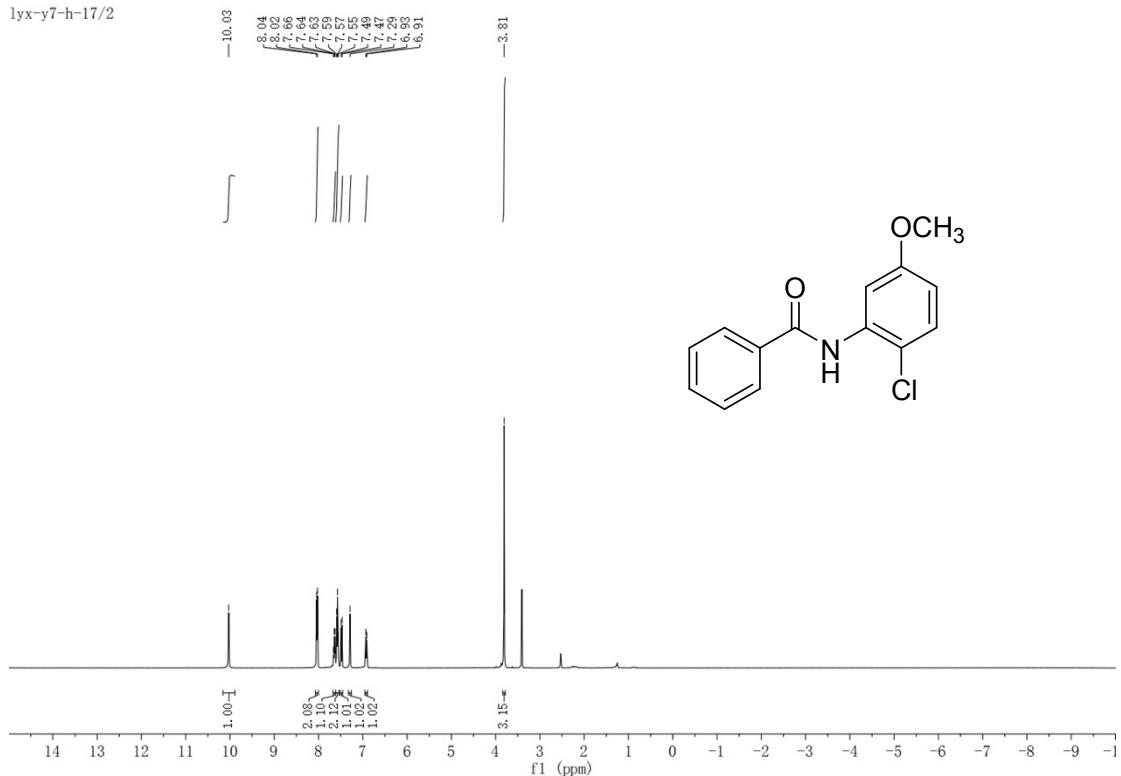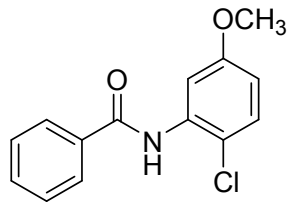

lyx-y7-c/7

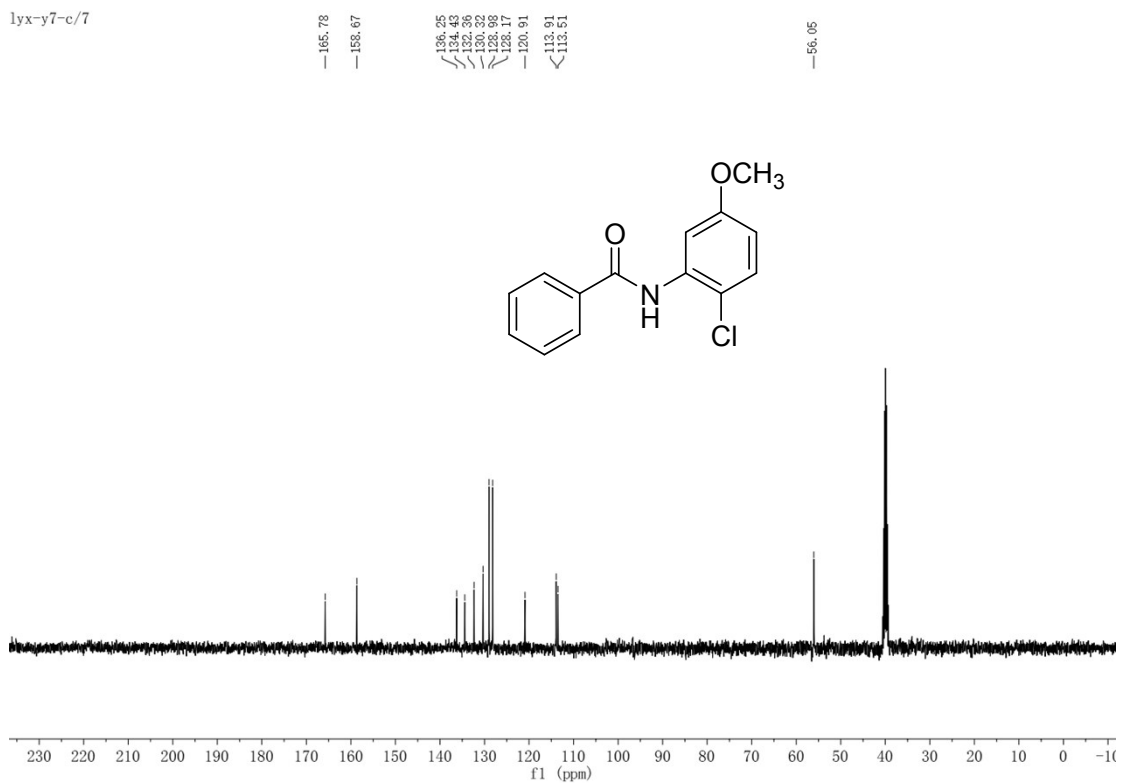

*N*-(2,5-dichlorophenyl)benzamide (**3ia**)

lyx-y1-h-1/1

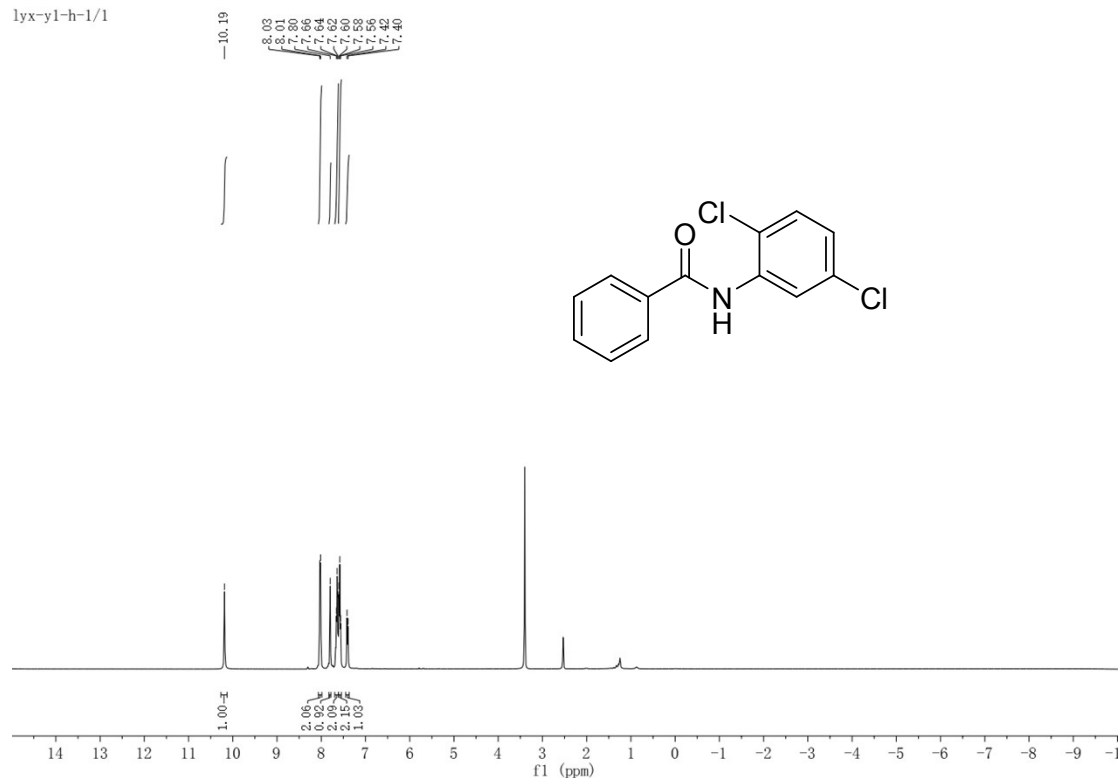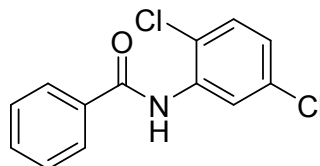

lyx-y1-c-1/2

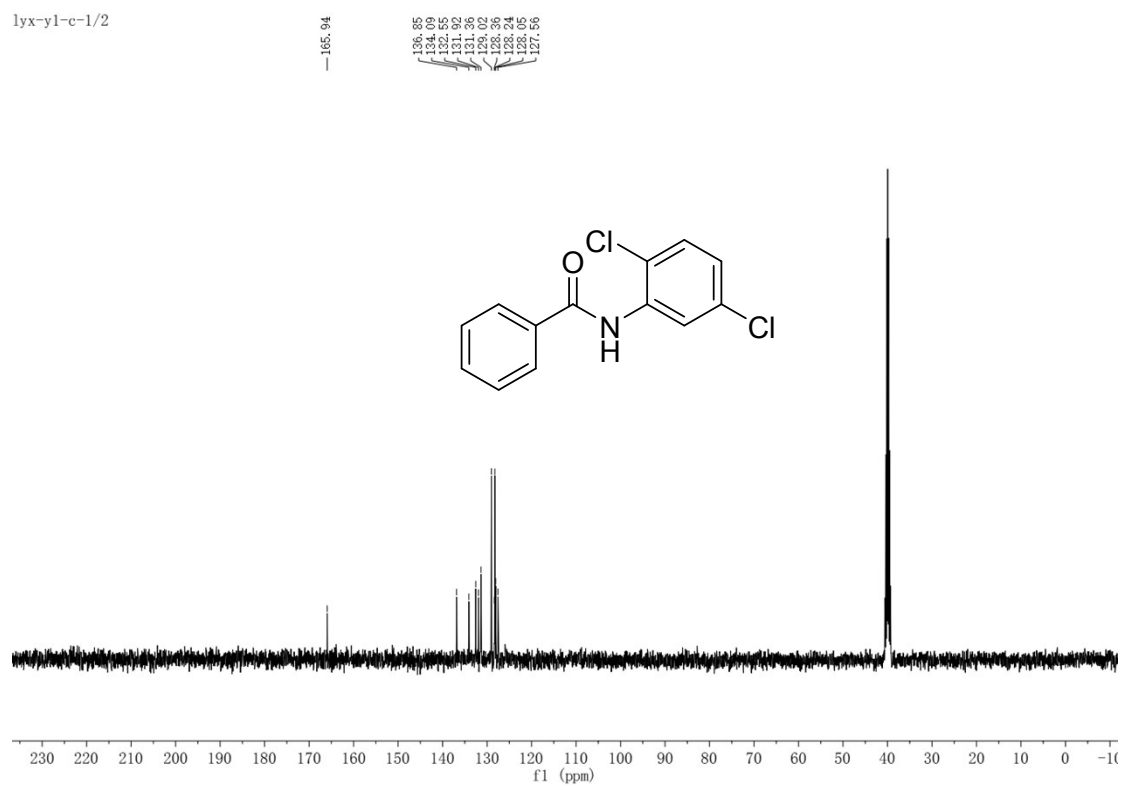

Supplement: d0ra10868e1.pdf [file d0ra10868e1.pdf]
